# Supplementary material
Source: HighWire-hosted journal article supplement (https://bmjopen.bmj.com/content/9/8/e028267)

### Supplementary Figure 1

Distribution in quartiles across the neighborhoods of Barcelona of: (a) average annual percentage of unemployed individuals, 2011; (b) the percentage of people aged >65 years who live alone, 2008; (c) the percentage of participation in general elections, 2011; and (d) the index of high-risk drug use, 2015.

(a) Average annual percentage of unemployed individuals, Barcelona 2011

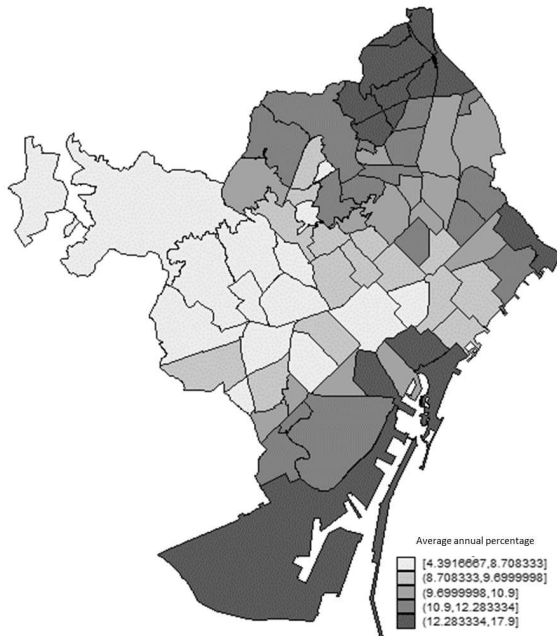

(b) Percentage of people aged >65 years who live alone, Barcelona 2008

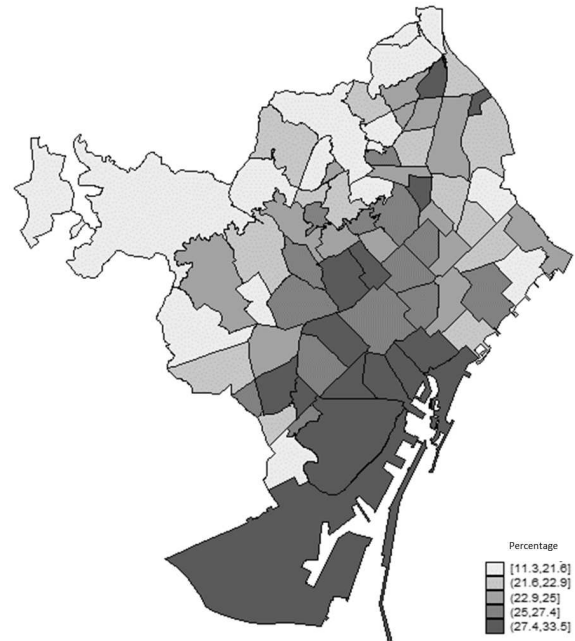

(c) Percentage of participation in general elections, Barcelona 2011

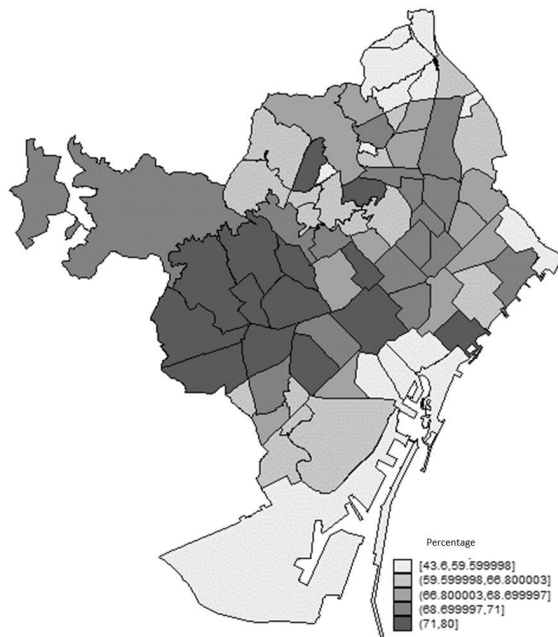

(d) Index of high-risk drug use, Barcelona 2015.

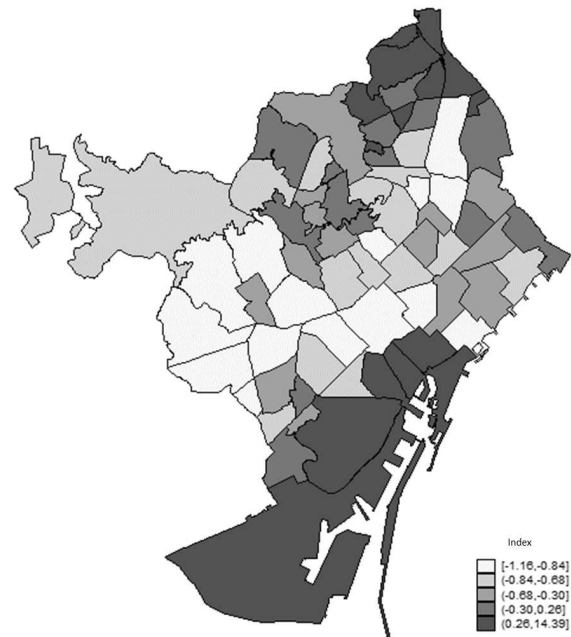

Supplement: inline-supplementary-material-1 [file inline-supplementary-material-1.pdf]
