# Supplementary material
Source: HighWire-hosted journal article supplement (https://bmjopen.bmj.com/content/9/8/e028267)
Supplement: inline-supplementary-material-2 [file inline-supplementary-material-2.pdf]

**Supplementary Table 1**

Absolute risk between suicide mortality and individual and contextual factors for each time period. Barcelona, 2006-2016

|                               |                     | Men                 |                     |                      | Women               |                     |                     |
|-------------------------------|---------------------|---------------------|---------------------|----------------------|---------------------|---------------------|---------------------|
|                               |                     | AR (95%CI)          |                     |                      | AR (95%CI)          |                     |                     |
|                               |                     | P 1                 | P 2                 | P 3                  | P 1                 | P 2                 | P 3                 |
| <b>Level of education</b>     | Primary or lower    | 2.42 (0.14, 4.70)   | -0.15 (-1.83, 1.52) | 0.16 (-1.70, 2.03)   | -0.49 (-1.46, 0.49) | -0.36 (-1.24, 0.53) | -0.18 (-0.78, 0.41) |
|                               | Secondary or higher | -                   | -                   | -                    | -                   | -                   | -                   |
| <b>% Unemployment</b>         | Q1 (least)          | -                   | -                   | -                    | -                   | -                   | -                   |
|                               | Q2                  | -0.11 (-2.12, 1.90) | 1.84 (-0.19, 3.87)  | 0.79 (-1.11, 2.70)   | -0.37 (-1.68, 0.94) | -0.01 (-1.12, 1.11) | -0.31 (-1.06, 0.44) |
|                               | Q3                  | -0.64 (-2.68, 1.40) | 2.52 (0.21, 4.83)   | 0.17 (-1.75, 2.09)   | -0.65 (-2.05, 0.75) | -0.80 (-1.94, 0.35) | -0.90 (-1.83, 0.03) |
|                               | Q4 (most)           | 0.16 (-2.11, 2.43)  | 1.29 (-0.914, 3.50) | 2.48 (-0.04, 4.99)   | -0.94 (-2.45, 0.57) | -0.06 (-1.37, 1.24) | -0.22 (-1.09, 0.65) |
| <b>% Elderly living alone</b> | Q1 (least)          | -                   | -                   | -                    | -                   | -                   | -                   |
|                               | Q2                  | 0.45 (-1.80, 2.70)  | -0.44 (-2.89, 2.00) | -0.30 (-2.50, 1.90)  | 1.06 (-0.57, 2.69)  | 0.04 (-1.22, 1.31)  | 0.32 (-0.38, 1.03)  |
|                               | Q3                  | -0.58 (-2.79, 1.63) | -1.09 (-3.55, 1.38) | -0.48 (-2.72, 1.76)  | 0.77 (-0.76, 2.29)  | 0.37 (-0.96, 1.70)  | 0.71 (-0.17, 1.60)  |
|                               | Q4 (most)           | 1.06 (-1.15, 3.27)  | -1.12 (-3.48, 1.24) | 0.79 (-1.42, 3.00)   | 0.15 (-1.14, 1.45)  | 0.03 (-1.19, 1.24)  | 0.92 (-0.03, 1.87)  |
| <b>% Voter turnout</b>        | Q1 (least)          | 2.74 (0.160, 5.32)  | -1.30 (-3.50, 0.89) | 1.03 (-1.44, 3.51)   | -0.72 (-2.25, 0.80) | 0.26 (-1.11, 1.64)  | -0.44 (-1.34, 0.46) |
|                               | Q2                  | 0.99 (-1.11, 3.08)  | 1.90 (-0.58, 4.37)  | 1.20 (-1.13, 3.53)   | -0.24 (-1.68, 1.20) | -0.21 (-1.38, 0.96) | -0.32 (-1.13, 0.49) |
|                               | Q3                  | 1.35 (-0.58, 3.27)  | -0.32 (-2.25, 1.61) | -1.93 (-3.85, -0.01) | -0.27 (-1.53, 1.00) | 0.00 (-1.05, 1.05)  | -0.19 (-0.91, 0.53) |
|                               | Q4 (most)           | -                   | -                   | -                    | -                   | -                   | -                   |
| <b>Drug use index</b>         | Q1 (least)          | -                   | -                   | -                    | -                   | -                   | -                   |
|                               | Q2                  | 0.41 (-1.38, 2.20)  | 0.38 (-1.42, 2.18)  | 0.12 (-1.62, 1.86)   | 0.19 (-0.96, 1.34)  | -0.43 (-1.45, 0.59) | 0.01 (-0.64, 0.67)  |
|                               | Q3                  | 0.31 (-1.82, 2.44)  | 3.33 (0.54, 6.11)   | 1.49 (-0.84, 3.82)   | 0.34 (-1.13, 1.82)  | -0.61 (-1.81, 0.60) | -0.25 (-1.03, 0.52) |
|                               | Q4 (most)           | 2.35 (-0.24, 4.95)  | -0.32 (-2.49, 1.84) | 1.34 (-1.07, 3.75)   | 0.07 (-1.43, 1.58)  | 0.50 (-1.01, 2.01)  | -0.14 (-1.00, 0.72) |

AR = absolute risk; P 1= pre-crisis period (2006-2008); P 2= early crisis period (2009-2012); P 3= late crisis period (2013-2016)

AR in relation with the highest level of every variable
